# Supplementary material for: Disclosing proteins in the leaves of cork oak plants associated with the immune response to Phytophthora cinnamomi inoculation in the roots: A long-term proteomics approach
Source: PubMed Central journal article supplement (PMC7822296; doi:10.1371/journal.pone.0245148), 2021-01-22
Supplement: pone.0245148.s003.pdf [file pone.0245148.s003.pdf]

**Table S1. References for cork oak plants.**

| Parental cork oak trees <sup>a</sup> | GPS references                    | Control plants (C) <sup>a</sup> | <i>P. cinnamomi</i> inoculated plants (I) <sup>a</sup> |
|--------------------------------------|-----------------------------------|---------------------------------|--------------------------------------------------------|
| S1.1 <sup>b</sup>                    | 37° 19.12079' N<br>7° 49.21280' W | S1.1.e <sup>b</sup>             | S1.1.1 <sup>b</sup>                                    |
| S2.1                                 | 37° 18.40576' N<br>7° 48.97250' W | S2.1.3                          | S2.1.1                                                 |
| S4.1                                 | 37° 19.40323' N<br>7° 47.41679' W | S4.1.3                          | S4.1.2                                                 |
| S5.1                                 | 37° 19.12010' N<br>7° 47.51810' W | S5.1.4                          | S5.1.1                                                 |
| S7.1                                 | 37° 19.11278' N<br>7° 48.10301' W | S7.1.4                          | S7.1.3                                                 |
| S8.1                                 | 37° 17.52274' N<br>7° 46.44931' W | S8.1.3                          | S8.1.1                                                 |

<sup>a</sup>The plants used in the experimental assay come from 6 parental cork oak trees, appearing in pairs, one in the control group (C) and the other in the inoculated group (I).

<sup>b</sup>Example: Cork oak tree S1.1 produced the acorns that gave rise to the plants S1.1.e (C) and S1.1.1 (I).
