# Supplementary material for: Disclosing proteins in the leaves of cork oak plants associated with the immune response to Phytophthora cinnamomi inoculation in the roots: A long-term proteomics approach
Source: PubMed Central journal article supplement (PMC7822296; doi:10.1371/journal.pone.0245148), 2021-01-22
Supplement: pone.0245148.s006.pdf [file pone.0245148.s006.pdf]

| Significantly enriched (FDR<0.05) GO Biological process terms and groups in the list of 80 differential proteins (p<0.05 or 0.5>FC>2 between Control and Inoculated) |                                                       |           |                 |                 |                  |           |                       |                    |
|----------------------------------------------------------------------------------------------------------------------------------------------------------------------|-------------------------------------------------------|-----------|-----------------|-----------------|------------------|-----------|-----------------------|--------------------|
| GO ID                                                                                                                                                                | GO Term                                               | Source    | Term FDR        | Group FDR       | Enrichment score | GO groups | % Associated proteins | Number of proteins |
| <b>GO:0072524</b>                                                                                                                                                    | <b>pyridine-containing compound metabolic process</b> | <b>BP</b> | <b>1.85E-04</b> | <b>1.29E-04</b> | <b>12.9</b>      | <b>4</b>  | <b>4.24</b>           | <b>5.00</b>        |
| GO:0019362                                                                                                                                                           | pyridine nucleotide metabolic process                 | BP        | 2.07E-04        | 1.29E-04        | 12.9             | 4         | 4.50                  | 5.00               |
| GO:0006733                                                                                                                                                           | oxidoreduction coenzyme metabolic process             | BP        | 2.09E-04        | 1.29E-04        | 12.9             | 4         | 4.00                  | 5.00               |
| GO:0046496                                                                                                                                                           | nicotinamide nucleotide metabolic process             | BP        | 2.64E-04        | 1.29E-04        | 12.9             | 4         | 4.55                  | 5.00               |
| GO:0006739                                                                                                                                                           | NADP metabolic process                                | BP        | 5.49E-04        | 1.29E-04        | 12.9             | 4         | 8.33                  | 3.00               |
| GO:0006081                                                                                                                                                           | cellular aldehyde metabolic process                   | BP        | 2.07E-03        | 1.29E-04        | 12.9             | 4         | 4.05                  | 3.00               |
| <b>GO:0046365</b>                                                                                                                                                    | <b>monosaccharide catabolic process</b>               | <b>BP</b> | <b>3.34E-07</b> | <b>3.53E-04</b> | <b>11.5</b>      | <b>6</b>  | <b>44.44</b>          | <b>4.00</b>        |
| GO:0019320                                                                                                                                                           | hexose catabolic process                              | BP        | 2.30E-05        | 3.53E-04        | 11.5             | 6         | 37.50                 | 3.00               |
| GO:0072524                                                                                                                                                           | pyridine-containing compound metabolic process        | BP        | 1.85E-04        | 3.53E-04        | 11.5             | 6         | 4.24                  | 5.00               |
| GO:0005996                                                                                                                                                           | monosaccharide metabolic process                      | BP        | 1.96E-04        | 3.53E-04        | 11.5             | 6         | 4.35                  | 5.00               |
| GO:0019362                                                                                                                                                           | pyridine nucleotide metabolic process                 | BP        | 2.07E-04        | 3.53E-04        | 11.5             | 6         | 4.50                  | 5.00               |
| GO:0006733                                                                                                                                                           | oxidoreduction coenzyme metabolic process             | BP        | 2.09E-04        | 3.53E-04        | 11.5             | 6         | 4.00                  | 5.00               |
| GO:0046496                                                                                                                                                           | nicotinamide nucleotide metabolic process             | BP        | 2.64E-04        | 3.53E-04        | 11.5             | 6         | 4.55                  | 5.00               |
| GO:0019318                                                                                                                                                           | hexose metabolic process                              | BP        | 3.77E-04        | 3.53E-04        | 11.5             | 6         | 5.19                  | 4.00               |
| GO:0006739                                                                                                                                                           | NADP metabolic process                                | BP        | 5.49E-04        | 3.53E-04        | 11.5             | 6         | 8.33                  | 3.00               |
| GO:0006006                                                                                                                                                           | glucose metabolic process                             | BP        | 6.23E-04        | 3.53E-04        | 11.5             | 6         | 7.32                  | 3.00               |
| GO:0009135                                                                                                                                                           | purine nucleoside diphosphate metabolic process       | BP        | 1.71E-03        | 3.53E-04        | 11.5             | 6         | 4.48                  | 3.00               |
| GO:0009185                                                                                                                                                           | ribonucleoside diphosphate metabolic process          | BP        | 1.71E-03        | 3.53E-04        | 11.5             | 6         | 4.48                  | 3.00               |
| GO:0009179                                                                                                                                                           | purine ribonucleoside diphosphate metabolic process   | BP        | 1.71E-03        | 3.53E-04        | 11.5             | 6         | 4.48                  | 3.00               |
| GO:0006757                                                                                                                                                           | ATP generation from ADP                               | BP        | 1.71E-03        | 3.53E-04        | 11.5             | 6         | 4.48                  | 3.00               |
| GO:0046031                                                                                                                                                           | ADP metabolic process                                 | BP        | 1.71E-03        | 3.53E-04        | 11.5             | 6         | 4.48                  | 3.00               |
| GO:0006096                                                                                                                                                           | glycolytic process                                    | BP        | 1.71E-03        | 3.53E-04        | 11.5             | 6         | 4.48                  | 3.00               |
| GO:0006165                                                                                                                                                           | nucleoside diphosphate phosphorylation                | BP        | 2.00E-03        | 3.53E-04        | 11.5             | 6         | 4.17                  | 3.00               |
| GO:0009132                                                                                                                                                           | nucleoside diphosphate metabolic process              | BP        | 2.06E-03        | 3.53E-04        | 11.5             | 6         | 4.00                  | 3.00               |
| GO:0046939                                                                                                                                                           | nucleotide phosphorylation                            | BP        | 2.07E-03        | 3.53E-04        | 11.5             | 6         | 4.05                  | 3.00               |
| <b>GO:0043094</b>                                                                                                                                                    | <b>cellular metabolic compound salvage</b>            | <b>BP</b> | <b>5.65E-04</b> | <b>5.90E-04</b> | <b>10.7</b>      | <b>3</b>  | <b>4.21</b>           | <b>4.00</b>        |
| GO:0009853                                                                                                                                                           | photorespiration                                      | BP        | 1.14E-03        | 5.90E-04        | 10.7             | 3         | 5.56                  | 3.00               |
| <b>GO:0065004</b>                                                                                                                                                    | <b>protein-DNA complex assembly</b>                   | <b>BP</b> | <b>4.08E-04</b> | <b>9.43E-04</b> | <b>10.1</b>      | <b>5</b>  | <b>4.94</b>           | <b>4.00</b>        |
| GO:0071824                                                                                                                                                           | protein-DNA complex subunit organization              | BP        | 5.23E-04        | 9.43E-04        | 10.1             | 5         | 4.40                  | 4.00               |
| GO:0006334                                                                                                                                                           | nucleosome assembly                                   | BP        | 6.23E-04        | 9.43E-04        | 10.1             | 5         | 7.32                  | 3.00               |
| GO:0031497                                                                                                                                                           | chromatin assembly                                    | BP        | 9.81E-04        | 9.43E-04        | 10.1             | 5         | 6.12                  | 3.00               |
| GO:0034728                                                                                                                                                           | nucleosome organization                               | BP        | 1.03E-03        | 9.43E-04        | 10.1             | 5         | 5.88                  | 3.00               |
| GO:0006333                                                                                                                                                           | chromatin assembly or disassembly                     | BP        | 1.44E-03        | 9.43E-04        | 10.1             | 5         | 4.84                  | 3.00               |
| GO:0006323                                                                                                                                                           | DNA packaging                                         | BP        | 1.45E-03        | 9.43E-04        | 10.1             | 5         | 4.92                  | 3.00               |
| <b>GO:0034440</b>                                                                                                                                                    | <b>lipid oxidation</b>                                | <b>BP</b> | <b>1.14E-03</b> | <b>9.53E-04</b> | <b>10.0</b>      | <b>1</b>  | <b>5.56</b>           | <b>3.00</b>        |
| <b>GO:0034976</b>                                                                                                                                                    | <b>response to endoplasmic reticulum stress</b>       | <b>BP</b> | <b>1.32E-03</b> | <b>9.79E-04</b> | <b>10.0</b>      | <b>2</b>  | <b>5.17</b>           | <b>3.00</b>        |

The leading term of each enriched group is that with the lowest term FDR (highest enrichment score), highlighted in bold and used to name the respective group.
