# Supplementary material for: Disclosing proteins in the leaves of cork oak plants associated with the immune response to Phytophthora cinnamomi inoculation in the roots: A long-term proteomics approach
Source: PubMed Central journal article supplement (PMC7822296; doi:10.1371/journal.pone.0245148), 2021-01-22
Supplement: pone.0245148.s007.pdf [file pone.0245148.s007.pdf]

| Significantly enriched (FDR<0.05) GO Cellular Component terms and groups in the 80 differential proteins (p<0.05 or 0.5>FC>2 between Control and Inoculated) |                                   |           |                 |                 |                  |           |                       |                    |
|--------------------------------------------------------------------------------------------------------------------------------------------------------------|-----------------------------------|-----------|-----------------|-----------------|------------------|-----------|-----------------------|--------------------|
| GO_ID                                                                                                                                                        | GO_Term                           | Source    | Term FDR        | Group FDR       | Enrichment score | GO groups | % Associated proteins | Number of proteins |
| <b>GO:0044445</b>                                                                                                                                            | <b>Cytosolic part</b>             | <b>CC</b> | <b>4.83E-27</b> | <b>1.96E-25</b> | <b>82.1</b>      | <b>4</b>  | <b>7.20</b>           | <b>25.00</b>       |
| GO:0022626                                                                                                                                                   | Cytosolic ribosome                | CC        | 1.02E-26        | 1.96E-25        | 82.1             | 4         | 7.57                  | 24.00              |
| GO:0005840                                                                                                                                                   | Ribosome                          | CC        | 1.42E-24        | 1.96E-25        | 82.1             | 4         | 5.49                  | 25.00              |
| GO:0044391                                                                                                                                                   | Ribosomal subunit                 | CC        | 2.01E-20        | 1.96E-25        | 82.1             | 4         | 6.83                  | 19.00              |
| GO:0022627                                                                                                                                                   | Cytosolic small ribosomal subunit | CC        | 2.85E-12        | 1.96E-25        | 82.1             | 4         | 9.17                  | 10.00              |
| GO:0015935                                                                                                                                                   | Small ribosomal subunit           | CC        | 7.46E-12        | 1.96E-25        | 82.1             | 4         | 8.20                  | 10.00              |
| GO:0022625                                                                                                                                                   | Cytosolic large ribosomal subunit | CC        | 3.10E-10        | 1.96E-25        | 82.1             | 4         | 7.09                  | 9.00               |
| GO:0015934                                                                                                                                                   | Large ribosomal subunit           | CC        | 1.61E-09        | 1.96E-25        | 82.1             | 4         | 5.81                  | 9.00               |
| <b>GO:0010319</b>                                                                                                                                            | <b>Stromule</b>                   | <b>CC</b> | <b>1.17E-07</b> | <b>1.41E-07</b> | <b>22.8</b>      | <b>1</b>  | <b>13.89</b>          | <b>5.00</b>        |
| <b>GO:0000786</b>                                                                                                                                            | <b>Nucleosome</b>                 | <b>CC</b> | <b>5.74E-07</b> | <b>3.60E-05</b> | <b>14.8</b>      | <b>2</b>  | <b>10.00</b>          | <b>5.00</b>        |
| GO:0000785                                                                                                                                                   | Chromatin                         | CC        | 3.38E-05        | 3.60E-05        | 14.8             | 2         | 4.24                  | 5.00               |
| GO:0000790                                                                                                                                                   | Nuclear chromatin                 | CC        | 3.65E-05        | 3.60E-05        | 14.8             | 2         | 6.90                  | 4.00               |
| <b>GO:0009521</b>                                                                                                                                            | <b>Photosystem</b>                | <b>CC</b> | <b>6.51E-05</b> | <b>5.64E-05</b> | <b>14.1</b>      | <b>3</b>  | <b>5.71</b>           | <b>4.00</b>        |
| GO:0009522                                                                                                                                                   | Photosystem I                     | CC        | 1.64E-04        | 5.64E-05        | 14.1             | 3         | 8.57                  | 3.00               |
| GO:0009523                                                                                                                                                   | Photosystem II                    | CC        | 4.71E-04        | 5.64E-05        | 14.1             | 3         | 5.88                  | 3.00               |

The leading term of each enriched group is that with the lowest term FDR (highest enrichment score), highlighted in bold and used to name the respective group.
