# Supplementary material for: Disclosing proteins in the leaves of cork oak plants associated with the immune response to Phytophthora cinnamomi inoculation in the roots: A long-term proteomics approach
Source: PubMed Central journal article supplement (PMC7822296; doi:10.1371/journal.pone.0245148), 2021-01-22
Supplement: pone.0245148.s008.pdf [file pone.0245148.s008.pdf]

## Significantly enriched (FDR&lt;0.05) GO Biological process groups in the list of 80 differential proteins

| GO_ID      | GO_Term                                        | Ontology source | Term FDR | Group FDR | Enrichment score | GO groups | % Associated Proteins | Number of proteins |
|------------|------------------------------------------------|-----------------|----------|-----------|------------------|-----------|-----------------------|--------------------|
| GO:0072524 | Pyridine-containing compound metabolic process | GO_BP           | 1.85E-04 | 1.29E-04  | 12.9             | 4         | 4.24                  | 5.00               |
| GO:0046365 | Monosaccharide catabolic process               | GO_BP           | 3.34E-07 | 3.53E-04  | 11.5             | 6         | 44.44                 | 4.00               |
| GO:0043094 | Cellular metabolic compound salvage            | GO_BP           | 5.65E-04 | 5.90E-04  | 10.7             | 3         | 4.21                  | 4.00               |
| GO:0065004 | Protein-DNA complex assembly                   | GO_BP           | 4.08E-04 | 9.43E-04  | 10.1             | 5         | 4.94                  | 4.00               |
| GO:0034440 | Lipid oxidation                                | GO_BP           | 1.14E-03 | 9.53E-04  | 10.0             | 1         | 5.56                  | 3.00               |
| GO:0034976 | Response to endoplasmic reticulum stress       | GO_BP           | 1.32E-03 | 9.79E-04  | 10.0             | 2         | 5.17                  | 3.00               |
