# Supplementary material for: Disclosing proteins in the leaves of cork oak plants associated with the immune response to Phytophthora cinnamomi inoculation in the roots: A long-term proteomics approach
Source: PubMed Central journal article supplement (PMC7822296; doi:10.1371/journal.pone.0245148), 2021-01-22
Supplement: pone.0245148.s009.pdf [file pone.0245148.s009.pdf]

| Significantly enriched (FDR<0.05) GO Cellular Component groups in the list of 80 differential proteins |                |                 |          |           |                  |           |                       |                    |
|--------------------------------------------------------------------------------------------------------|----------------|-----------------|----------|-----------|------------------|-----------|-----------------------|--------------------|
| GO_ID                                                                                                  | GO_Term        | Ontology source | Term FDR | Group FDR | Enrichment score | GO groups | % Associated proteins | Number of proteins |
| GO:0044445                                                                                             | Cytosolic part | GO_CC           | 4.83E-27 | 1.96E-25  | 82.1             | 4         | 7.20                  | 25.00              |
| GO:0010319                                                                                             | Stromule       | GO_CC           | 1.17E-07 | 1.41E-07  | 22.8             | 1         | 13.89                 | 5.00               |
| GO:0000786                                                                                             | Nucleosome     | GO_CC           | 5.74E-07 | 3.60E-05  | 14.8             | 2         | 10.00                 | 5.00               |
| GO:0009521                                                                                             | Photosystem    | GO_CC           | 6.51E-05 | 5.64E-05  | 14.1             | 3         | 5.71                  | 4.00               |
