# Supplementary material for: Disclosing proteins in the leaves of cork oak plants associated with the immune response to Phytophthora cinnamomi inoculation in the roots: A long-term proteomics approach
Source: PubMed Central journal article supplement (PMC7822296; doi:10.1371/journal.pone.0245148), 2021-01-22
Supplement: pone.0245148.s012.pdf [file pone.0245148.s012.pdf]

## **S1 File - Materials and Methods.**

### Detailed description of LC-MS Materials and Methods.

#### **Sample preparation**

Upon arrival the samples were stored at  $-80^{\circ}\text{C}$  until further processing.

After thawing, 10  $\mu\text{g}$  of each sample from each group were pooled together, creating this way two pooled samples (Pool of control samples and infected samples). These pooled sample were created for library construction.

At this point the same amount of a recombinant protein (Green fluorescent Protein and Maltose-binding periplasmic protein (malE-GFP)) was added to the volume corresponding to 50  $\mu\text{g}$  of each sample and to the pools to serve as an internal standard. All the samples were boiled for 5 minutes and acrylamide was added as an alkylating agent.

#### **In-gel digestion and liquid chromatography coupled to tandem mass spectrometry (LC-MS/MS)**

All samples and pools were then loaded into a precast gel (4–20% Mini-Protean<sup>®</sup> TGX<sup>™</sup> Gel, Bio-Rad), as well as the pooled samples, and the SDS-PAGE was partially run for 20 minutes at 110V [1]. After SDS-PAGE, proteins were stained with Colloidal Coomassie Blue as previously described [2].

The lanes were sliced into 3 fractions with the help of a scalpel, and after the excision of the gel bands each one was sliced into smaller pieces. The gel pieces were destained using a 50 mM ammonium bicarbonate solution with 30% acetonitrile (ACN) followed by a washing step with water (each step was performed in a thermomixer (Eppendorf) at 1050 rpm for 15 min). The gel pieces were dehydrated on Concentrador Plus/Vacufuge<sup>®</sup> Plus (Eppendorf). To each gel band 75  $\mu\text{L}$  of trypsin (0.01  $\mu\text{g}/\mu\text{L}$  solution in 10 mM ammonium bicarbonate) were added to the dried gel bands and left for 15 min at  $4^{\circ}\text{C}$  to rehydrate the gel pieces. After this period 75  $\mu\text{L}$  of 10 mM ammonium bicarbonate were added and in-gel digestion was performed overnight at room temperature in the dark. After digestion, the excess solution from gel pieces was collected to a low binding microcentrifuge tube (LoBind<sup>®</sup>, Eppendorf) and peptides were extracted from the gel pieces by sequential addition of three solutions of increasing percentage of acetonitrile (30%, 50%, and 98%) in 1% formic acid (FA). After the addition of each solution, the gel pieces were shaken in a thermomixer (Eppendorf) at 1250 rpm for 15 min and the solution was collected to the tube containing the previous fraction. The peptide mixtures were dried by rotary evaporation under vacuum (Concentrador Plus/Vacufuge<sup>®</sup> Plus, Eppendorf). The peptides from each fraction of each sample were pooled together for SWATH analysis; the peptides from the pooled samples were kept separated in the three fractions of the digestion procedure.

After digestion, all samples were subjected to solid phase extraction with C18 sorbent (OMIX tip, Agilent Technologies). The eluted peptides were evaporated and solubilised in mobile phase, aided by ultrasonication using a cup horn device (Vibra-cell 750 watt, Sonics) at 40% amplitude for 2 minutes. Samples were then centrifuged for 5 minutes at 14,100xg (minispin plus, Eppendorf) and analysed by LC-MS/MS.

The Triple TOF<sup>™</sup> 5600 System (Sciex) was operated in two phases: information-dependent acquisition (IDA) of each fraction of the pooled samples; followed by SWATH (Sequential Windowed data independent Acquisition of the Total High-resolution Mass Spectra) acquisition of each sample. Peptide separation was performed using liquid chromatography (nanoLC Ultra 2D, Eksigent) on a ChromXP C18CL reverse phase column (300  $\mu\text{m} \times 15 \text{ cm}$ , 3  $\mu\text{m}$ , 120 $\text{\AA}$ , Eksigent) at 5  $\mu\text{L}/\text{min}$  with a 45

min linear gradient from 5% to 30% acetonitrile in 0.1% FA, and the peptides were eluted into the mass spectrometer using an electrospray ionization source (DuoSpray™ Source, Sciex).

Information dependent acquisition (IDA) experiments were performed by analysing 10 µL of each fraction of the pooled samples. The mass spectrometer was set for IDA scanning full spectra (350-1250 m/z) for 250 ms, followed by up to 100 MS/MS scans (100–1500 m/z from a dynamic accumulation time – minimum 30 ms for precursor above the intensity threshold of 1000 counts per second (cps) – in order to maintain a cycle time of 3.3 s). Candidate ions with a charge state between +2 and +5 and counts above a minimum threshold of 10 cps were isolated for fragmentation and one MS/MS spectra was collected before adding those ions to the exclusion list for 25 seconds (mass spectrometer operated by Analyst® TF 1.7, Sciex). Rolling collision energy was used with a collision energy spread of 5.

The SWATH setup was essentially as in Gillet et al [3], with the same chromatographic conditions used for SWATH and IDA acquisitions. For SWATH-MS based experiments, the mass spectrometer was operated in a looped product ion mode. The SWATH-MS setup was designed specifically for the samples to be analysed (S1 Table 1), in order to adapt the SWATH windows to the complexity of this batch of samples. A set of 60 windows of variable width (containing 1 m/z for window overlap) was constructed covering the precursor mass range of 350-1250 m/z. A 250 ms survey scan (350-1250 m/z) was acquired at the beginning of each cycle for instrument calibration and SWATH MS/MS spectra were collected from 100–1500 m/z for 50 ms resulting in a cycle time of 3.3 s from the precursors ranging from 350 to 1250 m/z. The collision energy for each window was determined according to the calculation for a charge +2 ion centered upon the window with variable collision energy spread (CES) according with the window.

### **Protein identification and relative quantification**

Specific library of precursor masses and fragment ions were created by combining all files from the IDA experiments, and used for subsequent SWATH processing. The library was obtained using ProteinPilot™ software (v5.0.1, Sciex), with the following search parameters: reviewed entries for *plant* from SwissProt database (release of April 2018) or reference proteomes downloaded from uniprot (April 2018) for *populus trichocarpa* (UP000006729) or *Arabidopsis thaliana* (UP000006548), to all databases the sequence of malE-GFP was added; acrylamide alkylated cysteines as fixed modification; and the gel based special focus option. An independent False Discovery Rate (FDR) analysis using the target-decoy approach provided with ProteinPilot™ software was used to assess the quality of the identifications, and positive identifications were considered when identified proteins and peptides reached a 5% local FDR. [4, 5]

Data processing was performed using SWATH™ processing plug-in for PeakView™ (v2.2, Sciex), briefly peptides were selected from the library using the following criteria: (i) the unique peptides for a specific targeted protein were ranked by the intensity of the precursor ion from the IDA analysis as estimated by the ProteinPilot™ software, and (ii) Peptides that contained biological modifications and/or were shared between different protein entries/isoforms were excluded from selection. Up to 15 peptides were chosen per protein, and SWATH™ quantitation was attempted for all proteins in the library file that were identified below 5% local FDR from ProteinPilot™ searches. Peptide's retention time was adjusted by using the malE-GFP peptides. In SWATH™ Acquisition data, peptides are confirmed by finding and scoring peak groups, which are a set of fragment ions for the peptide. Up to 5 target fragment ions were automatically selected and the peak groups were scored following the criteria described in Lambert et al [6]. Peak group confidence threshold was determined based on a

FDR analysis using the target-decoy approach and 1% extraction FDR threshold was used for all the analyses. Peptides that met the 1% FDR threshold in at least three replicates per group were retained, and the peak areas of the target fragment ions of those peptides were extracted across the experiments using an extracted-ion chromatogram (XIC) window of 4 minutes. Protein levels were estimated by summing all the transitions from all the peptides for a given protein [7] and normalized to the total intensity at the protein level.

The mass spectrometry proteomics data have been deposited to the ProteomeXchange Consortium via the PRIDE [8] partner repository with the dataset identifier [PXDXXXXX](#). 

### Statistical Analysis

To perform statistical comparisons between groups of samples to software SPSS v23 (IBM) was used. The non-parametric Mann Whitney U-test was used for all comparisons due to the reduced number of samples per comparison group or to the fact that the samples did not follow a normal distribution.

**S1 Table 1** – Information about the windows used in SWATH acquisition.



| Window    | Start Mass (Da) | Stop Mass (Da) | Mass Interval (Da) | CES |
|-----------|-----------------|----------------|--------------------|-----|
| Window 1  | 349.5           | 360.9          | 11.4               | 5   |
| Window 2  | 359.9           | 375.2          | 15.3               | 5   |
| Window 3  | 374.2           | 389.2          | 15                 | 5   |
| Window 4  | 388.2           | 402.2          | 14                 | 5   |
| Window 5  | 401.2           | 415.3          | 14.1               | 5   |
| Window 6  | 414.3           | 427.4          | 13.1               | 5   |
| Window 7  | 426.4           | 439.1          | 12.7               | 5   |
| Window 8  | 438.1           | 449.9          | 11.8               | 5   |
| Window 9  | 448.9           | 460.7          | 11.8               | 5   |
| Window 10 | 459.7           | 471.1          | 11.4               | 5   |
| Window 11 | 470.1           | 480.5          | 10.4               | 5   |
| Window 12 | 479.5           | 490            | 10.5               | 5   |
| Window 13 | 489             | 499            | 10                 | 5   |
| Window 14 | 498             | 508            | 10                 | 5   |
| Window 15 | 507             | 516.5          | 9.5                | 5   |
| Window 16 | 515.5           | 525.1          | 9.6                | 5   |
| Window 17 | 524.1           | 533.2          | 9.1                | 5   |
| Window 18 | 532.2           | 540.8          | 8.6                | 5   |
| Window 19 | 539.8           | 548.5          | 8.7                | 5   |
| Window 20 | 547.5           | 555.7          | 8.2                | 5   |
| Window 21 | 554.7           | 563.4          | 8.7                | 5   |
| Window 22 | 562.4           | 570.6          | 8.2                | 5   |
| Window 23 | 569.6           | 577.8          | 8.2                | 5   |
| Window 24 | 576.8           | 585.4          | 8.6                | 5   |
| Window 25 | 584.4           | 592.6          | 8.2                | 5   |
| Window 26 | 591.6           | 600.3          | 8.7                | 5   |
| Window 27 | 599.3           | 607.9          | 8.6                | 5   |

|           |        |        |       |    |
|-----------|--------|--------|-------|----|
| Window 28 | 606.9  | 615.6  | 8.7   | 5  |
| Window 29 | 614.6  | 623.2  | 8.6   | 5  |
| Window 30 | 622.2  | 630.9  | 8.7   | 5  |
| Window 31 | 629.9  | 638.5  | 8.6   | 5  |
| Window 32 | 637.5  | 646.2  | 8.7   | 5  |
| Window 33 | 645.2  | 653.8  | 8.6   | 5  |
| Window 34 | 652.8  | 661.5  | 8.7   | 5  |
| Window 35 | 660.5  | 669.1  | 8.6   | 5  |
| Window 36 | 668.1  | 677.2  | 9.1   | 5  |
| Window 37 | 676.2  | 685.3  | 9.1   | 5  |
| Window 38 | 684.3  | 693.9  | 9.6   | 5  |
| Window 39 | 692.9  | 702.9  | 10    | 5  |
| Window 40 | 701.9  | 711.9  | 10    | 5  |
| Window 41 | 710.9  | 721.3  | 10.4  | 5  |
| Window 42 | 720.3  | 731.2  | 10.9  | 5  |
| Window 43 | 730.2  | 741.6  | 11.4  | 5  |
| Window 44 | 740.6  | 752.4  | 11.8  | 5  |
| Window 45 | 751.4  | 763.6  | 12.2  | 5  |
| Window 46 | 762.6  | 775.8  | 13.2  | 5  |
| Window 47 | 774.8  | 787.9  | 13.1  | 5  |
| Window 48 | 786.9  | 800.5  | 13.6  | 8  |
| Window 49 | 799.5  | 814.5  | 15    | 8  |
| Window 50 | 813.5  | 829.3  | 15.8  | 8  |
| Window 51 | 828.3  | 845.5  | 17.2  | 8  |
| Window 52 | 844.5  | 865.3  | 20.8  | 8  |
| Window 53 | 864.3  | 886.5  | 22.2  | 8  |
| Window 54 | 885.5  | 911.2  | 25.7  | 8  |
| Window 55 | 910.2  | 939.1  | 28.9  | 8  |
| Window 56 | 938.1  | 972    | 33.9  | 8  |
| Window 57 | 971    | 1008.4 | 37.4  | 10 |
| Window 58 | 1007.4 | 1053.4 | 46    | 10 |
| Window 59 | 1052.4 | 1120   | 67.6  | 10 |
| Window 60 | 1119   | 1249.6 | 130.6 | 10 |

## References

1. 2015 <https://www.ncbi.nlm.nih.gov/pubmed/25418953>; #I Anjo, S.I., C. Santa, and B. Manadas, *Short GeLC-SWATH: a fast and reliable quantitative approach for proteomic screenings*. *Proteomics*, **15**(4): p. 757-62.
2. 2009 <http://www.ncbi.nlm.nih.gov/pubmed/19702335>; #I Manadas, B., et al., *BDNF-induced changes in the expression of the translation machinery in hippocampal neurons: protein levels and dendritic mRNA*. *J Proteome Res*, **8**(10): p. 4536-52.
3. 2012 <http://www.ncbi.nlm.nih.gov/pubmed/22261725>; #I Gillet, L.C., et al., *Targeted data extraction of the MS/MS spectra generated by data-independent acquisition: a new concept for consistent and accurate proteome analysis*. *Mol Cell Proteomics*, **11**(6): p. O111 016717.

4. 2009 <http://www.ncbi.nlm.nih.gov/pubmed/19523214>; #I Sennels, L., J.C. Bukowski-Wills, and J. Rappsilber, *Improved results in proteomics by use of local and peptide-class specific false discovery rates*. BMC Bioinformatics, **10**: p. 179.
5. 2008 <http://www.ncbi.nlm.nih.gov/pubmed/18700793>; #I Tang, W.H., I.V. Shilov, and S.L. Seymour, *Nonlinear fitting method for determining local false discovery rates from decoy database searches*. J Proteome Res, **7**(9): p. 3661-7.
6. 2013 <http://www.ncbi.nlm.nih.gov/pubmed/24162924>; #I Lambert, J.P., et al., *Mapping differential interactomes by affinity purification coupled with data-independent mass spectrometry acquisition*. Nat Methods, **10**(12): p. 1239-45.
7. 2013 <http://www.ncbi.nlm.nih.gov/pubmed/24162925>; #I Collins, B.C., et al., *Quantifying protein interaction dynamics by SWATH mass spectrometry: application to the 14-3-3 system*. Nat Methods, **10**(12): p. 1246-53.
8. 2016 <https://www.ncbi.nlm.nih.gov/pubmed/27683222>; #I Vizcaino, J.A., et al., *2016 update of the PRIDE database and its related tools*. Nucleic Acids Res, **44**(22): p. 11033.
